# Assessing the benefits of improving the resilience of water distribution networks

Bénédicte Rulleau

## ABSTRACT

Over the last 15 years, particular attention has been paid to the protection and security of so-called critical infrastructures, including drinking water distribution networks (WDN). Infrastructure managers are seeking to ensure their security and improve their resilience. However, the question of the economic efficiency and of the economic benefits provided by such measures remains open. The purpose of this article is to contribute to this debate. It presents the results of a Choice Experiment survey aimed at estimating the benefits of measures to protect against a potential cyberattack in the territory of Eurométropole de Strasbourg in France. The aggregate benefits of two resilience programs are assessed. They help make 'optimal' and informed decisions from a cost–benefit perspective.

**Key words** | benefits, critical infrastructures, drinking water network, economic valuation, resilience

Bénédicte Rulleau

INRAE,  
UR ETBX, 50 avenue de Verdun, 33612 Cestas  
cedex,  
France  
E-mail: benedicte.rulleau@inrae.fr

## HIGHLIGHTS

- This article aims to contribute to the debate on the economic efficiency of measures taken to improve the resilience of WDN.
- We investigate *ex-ante* measures aimed at reducing damage in the case of an extreme event occurring.
- We base our study on the cyberattack scenario, a human-induced ever-increasing threat.
- We conduct a Choice Experiment survey on users to assess their willingness-to-pay for resilience measures.
- Aggregated benefits range from €1.07 million to €12.7 million depending on the program and its cost.

## GRAPHICAL ABSTRACT

**Topic: resilience of drinking water distribution networks**

Objective: estimate the benefits of improving the resilience of water distribution networks to inform decision-making

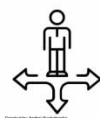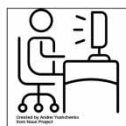

Threat: cyberattack

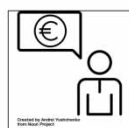

Method: survey of users to estimate their willingness to pay for resilience measures

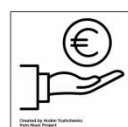

Results: range of aggregated benefits from €1.07 to €12.7 million depending on the resilience program and its cost

doi: 10.2166/ws.2020.127

## INTRODUCTION

Over the last 15 years, and especially since the terrorist attacks on New York in 2001, special attention has been paid to the issues of protecting and ensuring the security of so-called critical infrastructures, including drinking water distribution networks (WDN) (Galland 2010). These infrastructures are generally faced with two distinct types of threat: climate change and extreme natural events (floods, drought, etc.) and wilful human-induced risks (unauthorised access to a facility, accidental or intentional contamination of water, etc.) (Haimes *et al.* 1998; Janke *et al.* 2014). This may not only damage the infrastructure itself, but can also (and perhaps more importantly) have severe impacts for business and residential users (Brozović *et al.* 2007). The consequences of failures may extend well beyond the losses of a WDN, and can affect the capacity of other infrastructures and systems to operate normally (Haimes *et al.* 1998). Water utilities, which are generally required to assess the vulnerability of their infrastructures (Benabid *et al.* 2012), are therefore taking an ever greater interest in the issues surrounding the qualitative and quantitative security of their water provision (Barbier 2011). Climate change emphasises the need to diversify sources of water supply and increase the number of interconnections. Water managers seek to secure their respective WDNs using telemetry, smart sensors, real-time data reporting and analysis (among others), all of which are measures intended to improve network resilience (Hall *et al.* 2019b).

Resilience is a polysemous word (de Bruijn *et al.* 2017; Johannessen & Wamsler 2017). It is defined in this article as the capacity of a system to recover its performance level following an abnormal disturbance (Werey *et al.* 2016). This approach refers to the four properties highlighted by Bruneau *et al.* (2003), namely the robustness (capacity to avoid dysfunctions), redundancy (capacity to reduce their technical and functional impacts), rapidity (capacity to recover a performant level of service as soon as possible following a dysfunction) and resourcefulness (ability to mobilise the necessary resources).

Resilience constitutes a turning point in risk management since it is not a question of managing impacts once

they occur, but rather one of coping with the event (Boin & McConnell 2007). The emergence of these issues opens up new avenues of research, namely the economic efficiency of measures aimed at making WDN more resilient, and the benefits they provide (Environment Agency 2015). This article aims to fill this gap by contributing to the debate on the economic efficiency of measures taken to improve the resilience of critical infrastructures.

The present paper is original on several counts. Firstly, it explores the views and perceptions of people who use infrastructures, that is those who may be impacted in the event of service interruption or malfunction. As such, it endeavours to provide decision makers with important insights about users' preferences and benefits provided by resilience measures. Our work makes use of a monetary valuation method, the Choice Experiment (CE) (Louviere 1988; Bennett & Blamey 2001), which involves conducting a survey on users of the drinking water supply service to assess their Willingness-To-Pay (WTP) for resilience measures.

This study also focuses on resilience, i.e. assisting decision makers to decide between a public policy on protection that improves crisis response or one that promotes *ex-ante* measures aimed at reducing impacts. There is a broad body of literature covering users' WTP for increases in water supply reliability to mitigate climate-induced impacts on water resources (e.g. Howe & Smith 1993; Howe *et al.* 1994; Griffin & Mjelde 2000; Koss & Khawaja 2001; Hensher *et al.* 2005b, 2006; Tapsuwan *et al.* 2014; del Saz-Salazar *et al.* 2016; Appiah *et al.* 2019; Cooper *et al.* 2019; Islam *et al.* 2019). However, we found very few studies relating to WTP to improve the resilience of critical infrastructure. Some examples of these are Maliszewski *et al.* (2013), Thacker *et al.* (2018) and Baik *et al.* (2020) who examined the electricity sector and Wang *et al.* (2018) who considered the transportation system in New York City. Regarding WDN, Brozović *et al.* (2007) used the Contingent Valuation Method (CVM) to estimate WTP to avoid water supply interruption in the case of earthquake. More recently, Price *et al.* (2019) used CE to assess Canadian households'

WTP for avoiding service disruptions in the case of flood events. However, these studies focused on the WTP to reduce the likelihood that an event will occur (i.e. of a risk reduction), whereas we are investigating *ex-ante* measures aimed at reducing damage in the case of an extreme event occurring, which has more to do with adaptation issues.

While other studies mentioned consider natural disasters (hurricanes for Wang *et al.* (2018), earthquake for Brozović *et al.* (2007), flooding for Thacker *et al.* (2018) and Price *et al.* (2019), very cold winter weather for Baik *et al.* (2020)), this work focuses on a man-made risk, namely a cyberattack. Our starting point was the fact that while protection against natural risks is crucial, cybersecurity attacks are an ever-increasing threat (Clark *et al.* 2017) that deserve further examination. As noted by Haimès *et al.* (1998) the '*consequences of a terrorist act [...] could be compared to the potential consequences of catastrophic natural hazards, possibly to those with exceedingly large return periods*'. Finally, the attack in question targets the WDN of a French metropolitan area, that is to say the infrastructure itself, while other studies mainly deal with the impacts of catastrophic events on a territory (a city for instance) and not specifically on a critical infrastructure. A growing body of research estimates users' WTP for green infrastructures as a way to enhance the resilience of a city (Adegun 2017; Wang *et al.* 2017; Zalejska-Jonsson *et al.* 2020; to quote just a few recent examples).

The remainder of this article is structured as follows. The second section presents the methods. The third section presents the results. A discussion and a conclusion are proposed respectively in the fourth and fifth sections.

## MATERIALS AND METHODS

The survey was conducted in the territory of the Eurométropole de Strasbourg. It aims to identify users' preferences regarding and Willingness-To-Pay for different measures designed to improve the resilience of the WDN.

### Study area

The Eurométropole de Strasbourg is a French metropolitan area located close to the German border in the north-east of

France. It was created on 4 December 1967 under the name 'Communauté Urbaine de Strasbourg' and became a metropolis by the law of 27 January 2014 on the modernisation of territorial public action and the affirmation of metropolitan areas. Since 1 January 2017, the territory has been made up of 33 municipalities, covering a total area of 339.64 km<sup>2</sup>.

The Eurométropole de Strasbourg is the authority responsible for public water and sanitation services for all the municipalities. On 31 December 2016, it was in charge of the maintenance and operation of drinking water production and distribution equipment in 12 municipalities, under its own management, for a total of 426,819 inhabitants (48,920 customers). The drinking water production and distribution system of the remaining 16 municipalities (58,103 inhabitants for 18,824 customers) was operated by the Syndicat des Eaux et de l'Assainissement Alsace-Moselle (SDEA) (Figure 1). Volumes billed were respectively 26.633 million and 3.612 million m<sup>3</sup> (data from Eurométropole de Strasbourg (2017)).

The total WDN is 1,476 km long, mainly made up of 200 mm diameter pipes, made mainly of cast-iron. The water is abstracted from the Alsace water table, one of the largest in Europe. The Water and Sanitation Service of the Eurométropole de Strasbourg relies on four pumping stations, of which the Polygone catchment accounts for 80% of the supply, while also feeding into a storage tank. The average water price is €1.64 per m<sup>3</sup> for 120 m<sup>3</sup> in the municipalities supplied by the Eurométropole de Strasbourg, varying between €1.53 and €1.68 per m<sup>3</sup> for 120 m<sup>3</sup> in the sector supplied by the SDEA (data from Eurométropole de Strasbourg (2017)).

### Creation of the scenarios and resilience programs

This work focuses on the preferences of Eurométropole de Strasbourg's inhabitants for improving the resilience of their WDN. The scenario assumes a malicious attack on the Polygone pumping station, coupled with false data being fed into the monitoring system so that the utility does not notice, and does nothing to counter the drop in pressure. Such a cyberattack would likely lead to interruptions in water supply, or even a ban on using tap water for several days, while drinking water potability tests are carried out. Bottled water would then be handed out for free at

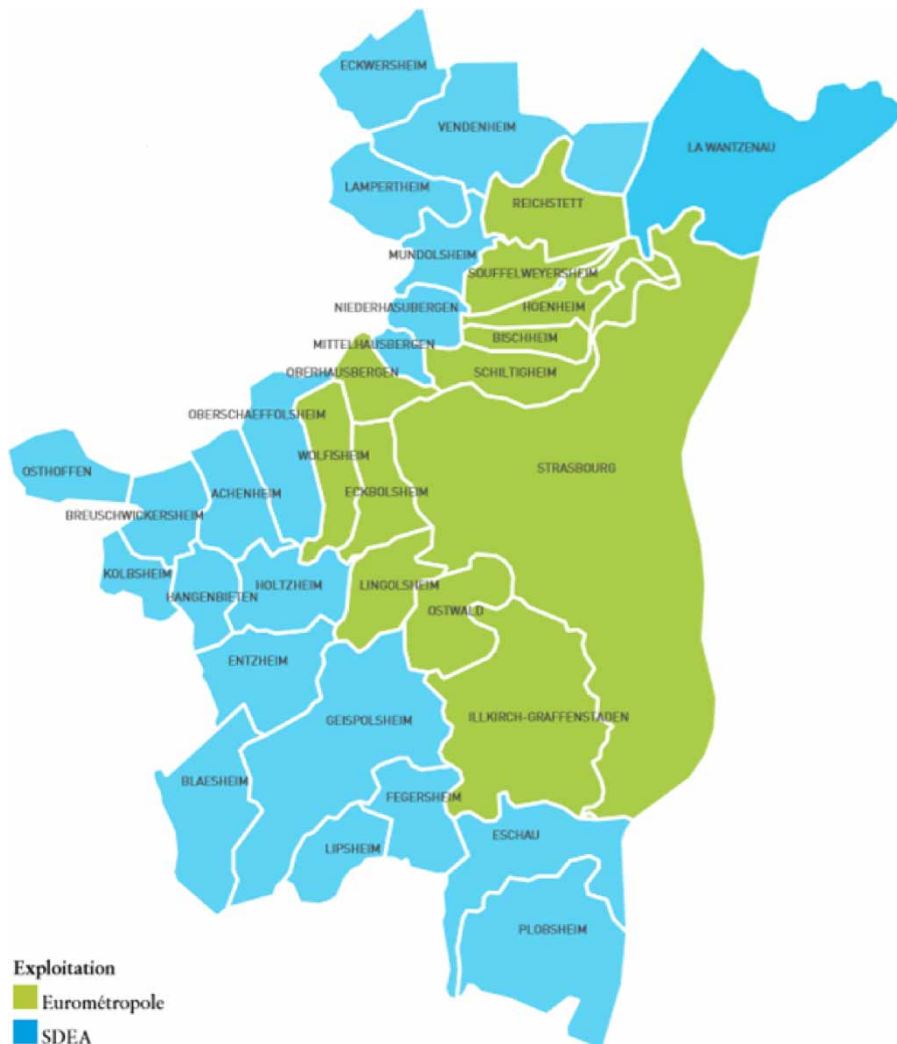

**Figure 1** | The territory of the Eurométropole de Strasbourg (Eurométropole de Strasbourg 2017) on 1 January 2017.

different locations throughout the city. Some people regarded as ‘vulnerable’, i.e. the elderly and infirm, who cannot attend the water distribution points, or those who are not able to read or understand safety instructions, could be particularly affected.

Two resilience programs are studied. They are based on the implementation of *ex-ante* measures designed to achieve a rapid return to normal operating conditions, thus reducing the consequences of the cyberattack on the utility and on users. More specifically, this goal is addressed through the following:

- The purchase of dedicated equipment such as smart water meters or sensors able to swiftly identify errors

and inconsistencies so that the utility is able to deal with them rapidly, and tablet computers to help locate ‘vulnerable’ people, etc.

- The development of software to provide a clearer picture of how the WDN works.
- Training programs for staff in improved risk management and the care of vulnerable people, etc., so that they can intervene more quickly and more effectively.
- Raising awareness among users and local populations about what they should do in the event of a network malfunction.

These measures would be implemented and coordinated by the Prefect, the Mayor and the water utility.

The resilience programs are compared with the status quo, i.e. the way the utility would deal with the attack based on its current practices, organisation, reaction capacity and effectiveness, etc.

### The Choice Experiment method

Choice Experiment (Louviere 1988; Bennett & Blamey 2001) is a monetary valuation method used to reliably place a monetary value on non-market goods and services. It is an extension of the well-known CVM. Both are based on preferences stated during a survey. However, instead of presenting the respondent with a single scenario involving the provision of a good or service, at a given cost, CE asks respondents to choose a single preferred option from two or more alternatives built as a bundle of different characteristics, called ‘attributes’. CE is grounded in Lancaster’s characteristics demand theory (1966) which states that consumers derive utility not from a good itself but from the various characteristics of this good.

CE may have weaknesses, chiefly the fact that surveys are cognitively demanding (Hess & Daly 2014). However, bearing in mind the recommendations regarding its application (Johnston *et al.* 2017), we favoured this approach for a variety of reasons. First, while the avoided cost method or revealed reference methods would be easier and least costly to apply, they could not be used in our case, as we aim to value the resilience programs in conditions that do not currently exist. In other words, data that record people’s actual choices (Champ *et al.* 2017) do not exist in the cases that interest us, meaning that we need to rely on hypothetical scenarios. Furthermore, contrary to the above-mentioned approaches, CE assesses both use and non-use values (Bennett 2001), and considers both the tangible and intangible impacts of a potential form of damage. Additionally, we wanted to cover all the dimensions of the disaster. Second, compared with CVM, CE encourages respondents to concentrate on the trade-offs between characteristics rather than taking a position for or against resilience measures (Champ *et al.* 2017). CE also makes it possible to identify the trade-offs individuals make between the different consequences of resilience measures (Hess & Daly 2014) and as such provides policy-relevant information about what is important for people.

### Experimental design

The first stage in designing a CE questionnaire involves selecting the relevant attributes to describe the good or service under study, in our case resilience programs, and their levels (Johnston *et al.* 2017). Given the very limited research literature on the subject, five attributes were selected after discussion with the Water and Sanitation Service of the Eurométropole de Strasbourg (Table 1). They represent the impacts of a cyberattack, which can be significant to varying degrees, according to the level of resilience measures implemented.

Each attribute was then assigned levels. To do this, we considered two resilience programs:

- An intermediate-level resilience program ‘R + ’ based on the implementation of higher technical security solutions than those which currently exist, namely improved and more robust hydraulic models, ‘smart’ and optimally placed monitoring tools (sensors, flowmeters and water meters), etc. This reflects level 2 of the attributes.
- A high-level resilience program ‘R + +’, which goes beyond R+ in that it also makes use of human capacities

**Table 1** | Attributes and their levels

| Attributes | Description                                                          | Levels                                                                                |
|------------|----------------------------------------------------------------------|---------------------------------------------------------------------------------------|
| PERS       | Number of people affected by the malfunction                         | 1. 400,000 people<br>2. 200,000 people<br>3. 10,000 people                            |
| COUP       | Duration of water service interruption                               | 1. 4 hours<br>2. 3 hours<br>3. 2 hours                                                |
| REST       | Duration of restrictions on water consumption (drinking and cooking) | 1. 6 days<br>2. 5 days<br>3. 4 days                                                   |
| SENS       | Services for vulnerable people                                       | 1. Partial<br>2. Exhaustive<br>3. Exhaustive and taking individual needs into account |
| COST       | Cost per household (paid in a lump-sum)                              | 1. €0    3. €20    5. €40<br>2. €10    4. €30    6. €50                               |



(for example, training of employees of the water utility in crisis management, increased communication with users, etc.) and ensures the security of the supervision system. R++ would permit a return to normal operating conditions more quickly than R+. It corresponds to level 3 of the attributes.

The software NGene was used to create a D-efficient design for the survey (Hensher *et al.* 2005a) through a fractional factorial design (Rose *et al.* 2007). The 15 choice sets created in this way were then split into three versions of the questionnaire (Louviere 1988), so that, at the end, each respondent was presented with five choice sets.

Each choice set offers two alternative resilience options and the zero-cost status quo (Table 2). Each respondent had to choose his preferred option and the method assumes that

he/she will select the one that provides him/her with the highest level of utility.

### Questionnaire and data collection

The questionnaire was made up of six parts. The first two aimed to identify respondents' attitudes toward the environment (priorities in the allocation of public funds, main issues in terms of water management and drinking water supply, etc.) and their water consumption habits (water uses, time of consumption, bottled water use, water bill, etc.). The third part concentrated on their perception of water quality in the Eurométropole de Strasbourg and associated health risks. The fourth part focused on their appreciation of the water supply service (current performance, perception of the risks incurred by the utility and its users, past experience

**Table 2** | Example of a choice set

|                                                                      | Option A                                                                                                                                   | Option B                                                                                              | Option C (without extra protection measures)                                                           |
|----------------------------------------------------------------------|--------------------------------------------------------------------------------------------------------------------------------------------|-------------------------------------------------------------------------------------------------------|--------------------------------------------------------------------------------------------------------|
| Number of people affected by the malfunction                         | 10,000 people<br>                                       | 200,000 people<br> | 400,000 people<br> |
| Duration of water service interruption                               | 3 hours<br>                                             | 2 hours<br>        | 4 hours<br>         |
| Duration of restrictions on water consumption (drinking and cooking) | 6 days<br>                                              | 4 days<br>         | 6 days<br>          |
| Services for vulnerable people                                       | Exhaustive and taking individual needs into account<br> | Partial<br>        | Partial<br>        |
| Cost per household (paid in a lump-sum)                              | €40<br>                                                 | €10<br>            | €0                                                                                                     |
| Which option do you prefer?                                          | <input type="radio"/>                                                                                                                      | <input type="radio"/>                                                                                 | <input type="radio"/>                                                                                  |

of malfunctions, etc.). The fifth part was the choice sets along with the follow-up questions. The last part aimed at collecting the socio-economic characteristics of respondents (municipality of residence, age and level of education, household income, household structure including the presence of vulnerable consumers, etc.).

The valuation scenario first presented the vulnerability of the water utility in the face of cyberattacks, the impacts that such a malicious act would have on the populations concerned, and the preventive measures which could be implemented. The benefits of the hypothetical resilience programs were then depicted (i.e. the attributes) and the implementing and coordinating stakeholders (Prefect, Mayor and water utility) explicitly mentioned, as well as the payment vehicle. For half of the questionnaires selected at random, some explanations of how the choice sets work were provided. Finally, just before presenting the choice sets, the respondent was reminded of his/her budget constraints with a short cheap-talk script (Cummings & Taylor 1999).

This questionnaire was tested in February and March 2018. It was conducted face-to-face in May 2018. Sampling is based on two stratification variables: (i) the municipality of residence (Strasbourg/other municipalities supplied by the Eurométropole de Strasbourg/municipalities supplied by the SDEA) and (ii) the household structure (single persons/childless couples/other situations). A total of 512 people were consulted, of whom 485 completed the valuation exercise.

The majority (56%) of respondents are women. The mean age is 35 years, and a comparison of means test shows that people living in municipalities supplied by the Eurométropole de Strasbourg are significantly younger (34 against 39 years), due in part to the city's large student population. This is confirmed by the fact that education levels are significantly lower in these municipalities (significant chi-square statistic). However, respondents are generally well-educated, since 80% of them hold a bachelor's degree, and 35% of them have completed at least three years of undergraduate studies. The mean income is €2,123 per household per month. A majority of respondents were not familiar with survey topics, with only 17% stating that they worked or studied in the environmental field, 15% in risk management, and 9% in water management. The share of people working in the health sector is slightly higher

(27%). Finally, almost one third of respondents are members of associations. Of those, 14% belong to an environmental protection association, and 28% have made donations to environmental protection associations in the last five years.

## RESULTS

### Specification of the utility function

Random utility theory (McFadden 1974; Manski 1977) describes the behaviour of consumers making discrete choices in a utility maximising context. It assumes that the indirect utility  $U_{ij}$  that individual  $i$  receives from making the choice  $j$  is composed of (i) a deterministic and observable part  $V_{ij}$  and (ii) a random part  $\varepsilon_{ij}$ :

$$U_{ij} = V_{ij} + \varepsilon_{ij} \quad (1)$$

In a choice set  $t$ , the individual  $i$  is then supposed to choose alternative  $g$  ( $\forall g \neq h$ ) rather than  $h$  if and only if  $U_{ig} > U_{ih}$ , so that the probability that he/she chooses  $g$  rather than  $h$  is (Greene 2003):

$$\Pr_{igt} = \Pr(U_{igt} > U_{iht}) = \Pr(V_{igt} - V_{iht} > \varepsilon_{iht} - \varepsilon_{igt}) \quad (2)$$

The specification of the econometric model used to model this probability depends on what assumptions are made about the distribution of the  $\varepsilon_{ij}$ . In the McFadden conditional logit (1974), which originates from random utility theory, the error terms are independent and identically distributed (iid) with Gumbel distribution.

The conditional logit, the simplest model, assumes that personal characteristics are identical for all choices. They do not enter into the formula of  $\Pr_{igt}$  which is written, for each choice set (Greene 2003):

$$\Pr_{igt} = \frac{\exp(\beta' w_{ig})}{\sum_j \exp(\beta' w_{ij})} \quad (3)$$

with  $w_{ij}$  the attributes of alternative  $j$  and  $\beta$  their coefficients. For two alternatives  $g$  and  $h$  belonging to the same choice set, the odd-ratio indicating the relative probability to choose  $g$  rather than  $h$  does not depend on alternatives

other than  $g$  and  $h$  (regardless of whether they are in the same choice set or not). The conditional logit verifies the Independence of Irrelevant Alternatives (IIA) hypothesis.

The explanatory variables of the conditional logit are the sole attribute levels, i.e. choices are modelled as a function of choice sets' characteristics, with the basic levels being used as the reference. The multinomial logit makes it possible to go further and introduce the socio-economic variables, that is to say the chooser's characteristics. While the log-likelihood remains identical to that of the conditional logit, the odd-ratio does not always satisfy the IIA assumption. In addition, the *iid* property of the error terms may potentially be violated. Other models such as the latent class logit or the mixed logit may be used to capture preference heterogeneity across individuals; however, a multinomial logit that includes one discriminating and highly significant socio-economic variable will provide results of adequate quality and an appropriate level of details for the purposes of this study.

To eliminate potential misinterpretation related to traditional binary coding, as well as determining coefficients of the attribute reference levels, we applied effect coding to the attributes with qualitative levels (Bech & Gyrd-Hansen 2005).

### Econometric modelling

Table 3 provides the results of the logit multinomial. The analysis was performed using the R package 'mlogit' (Croissant 2020). The model fit is indicated by the McFadden pseudo- $R^2$  (Hanemann & Kanninen 1999) which is not bad in practice since it equals 0.11 whereas it should ideally be between 0.2 and 0.4 (Hensher & Johnson 1981). A relatively large proportion of respondents' choices can thus be explained through attribute levels alone.

The coefficients of PERS3 and REST2 are not significantly different from (0). In other words, the fact that 400,000 inhabitants are affected by the malfunction, and that the restrictions on water consumption remain in place for five days, do not influence respondents' choices. The coefficient of COST is significant and negative. As expected, this attribute negatively affects the probability of choosing an alternative rather than the reference situation.

**Table 3** | Results of the conditional logit

| Variables              | Coeff.    | Std. Err. |
|------------------------|-----------|-----------|
| PERS2                  | 0.13***   | 0.05      |
| PERS3                  | − 0.08*   | 0.05      |
| COUP2                  | 0.09*     | 0.05      |
| COUP3                  | 0.12***   | 0.05      |
| REST2                  | 0.04      | 0.04      |
| REST3                  | 0.22***   | 0.04      |
| SENS2                  | 0.25***   | 0.04      |
| SENS3                  | 0.57***   | 0.04      |
| COST                   | − 0.03*** | 0.00      |
| ASC1                   | − 0.47*** | 0.15      |
| ALT_STBG1              | 0.35***   | 0.11      |
| ASC2                   | − 0.53*** | 0.15      |
| ALT_STBG2              | 0.30**    | 0.11      |
| Number of observations | 2,303     |           |
| Log-likelihood         | − 2,256.5 |           |
| McFadden pseudo- $R^2$ | 0.11      |           |

Statistical significance levels are indicated as follows: \* = 10%; \*\* = 5%; \*\*\* = 1%.

The Alternative Specific Constants (ASC), which capture the effect of the variations among choices not taken into account by the attributes, are negative. This means that not choosing the reference situation reduces utility, a reduction which is then theoretically compensated by the presence of the attributes. This result highlights the existence of a status quo bias (Kahneman *et al.* 1991; Meyerhoff & Liebe 2009). The coefficients of STBG are also significant and negative. The inhabitants of Strasbourg thus have a higher probability of choosing alternatives 1 or 2 rather than the reference situation, i.e. a higher probability of choosing a resilience program.

The coefficients for the reference levels of the attributes were calculated using the following formula (with  $b_n$  the coefficient of level  $n$ ) (Holmes & Adamowicz 2003):

$$b_1 = -(b_2 + b_3) \quad (4)$$

They are proposed in Table 4. Only the coefficient of SENS1 is significantly different from (0). The presence of the other lower attribute levels in an alternative does not influence the probability of choosing it.



**Table 4** | Coefficients of the lower attribute levels

| Attribute levels | Coeff.    | Std. Err. |
|------------------|-----------|-----------|
| PERS1            | − 0.04    | 0.22      |
| COUP1            | − 0.21    | 0.22      |
| REST1            | − 0.25    | 0.21      |
| SENS1            | − 0.83*** | 0.23      |

Statistical significance levels are indicated as follows: \*\*\* = 1%.

The calculation of these coefficients also allows for a comparison of the value of the different variations in resilience improvement. Consequently, for each attribute, we can check whether the coefficients increase with the level. This is actually the case for all attributes, except for the number of people affected by the malfunction. The fact that an alternative reduces the number of people affected to 10,000 reduces its probability of selection. This result is surprising insofar as this is the highest level of PERS. It could be due to the existence of a threshold in respondents' preferences.

### Estimation of the benefits provided by resilience programs

We now estimate the benefits given by the two resilience programs R+ and R++. As a reminder, all non-monetary attributes take their intermediate levels in R+ (PERS2, COUP2, REST2 and SENS2) and their higher levels in R++ (PERS3, COUP3, REST3 and SENS3). The reference situation with which they are compared is a status quo described by the lower levels of the non-monetary attributes (PERS1, COUP1, REST1 and SENS1). It is proposed at no cost (COST = 0).

The utility variations are derived from compensating surpluses, since we estimate WTP for an increased resilience of the WDN. The compensating surplus is defined as (Hanemann 1984):

$$CS_i = -\left(\frac{V_R - V_0}{\beta_{COST}}\right) \quad (5)$$

where  $V_0$  corresponds to the indirect utility received from the status quo and  $V_R$  the indirect utility received from a resilience program.  $\beta_{COST}$  represents the marginal utility of the monetary attribute, that is to say the coefficient of COST.

### Indirect utility associated with the status quo

In the conditional logit, the indirect utility function is the following (Bennett & Adamowicz 2001):

$$V = ASC + \beta_{PERS2} \times PERS2 + \beta_{PERS3} \times PERS3 + \beta_{COUP2} \times COUP2 + \beta_{COUP3} \times COUP3 + \beta_{REST2} \times REST2 + \beta_{REST3} \times REST3 + \beta_{SENS2} \times SENS2 + \beta_{SENS3} \times SENS3 + \beta_{COST} \times COST + \sum_h (\beta_{ih} w_h) \quad (6)$$

Following the results of the conditional logit (while retaining only the attribute levels whose coefficient was significantly different from (0)), we have:

$$V_R = ASC + 0.13PERS2 - 0.08PERS3 + 0.09COUP2 + 0.12COUP3 + 0.22REST3 + 0.25SENS2 + 0.57SENS3 - 0.03COST + 0.35STBG1 + 0.03STBG2 \quad (7)$$

Since coding effects have been used, the indirect utility provided by the status quo is calculated using (−1) for levels 2 and 3 of PERS, COUP, REST and SENS. In addition, the monetary attribute COST equals (0) and no ASC is associated since it is the reference situation. The individual characteristic of living in Strasbourg is also not considered because this variable was crossed with the ASC in the model. Consequently:

$$V_0 = -1.31$$

This value is negative, that is to say that the current situation in which the utilities take no additional preventive measures provides a loss of well-being.

### The indirect utility and surplus variations associated with the resilience programs

Equations (7) and (8) are also used to calculate the indirect utilities provided by the resilience programs. They were applied for the different levels of the COST attribute, since the objective was not to calculate the benefits provided by a scenario presented during the survey, but by the resilience programs, and we do not know at what cost they would be implemented.

In the case of R+ (resp. R++), levels 2 (resp. levels 3) of PERS, COUP, REST and SENS are assigned a value of (1) and levels 3 (resp. levels 2) a value of (0). In addition, we calculated the mean surplus using the mean value for STBG in the sample (Dachary-Bernard 2007), i.e.:

$$\overline{\text{STBG}} = 0.6174$$

These calculations were made with either ASC1 or ASC2, to reflect the fact that the resilience scenarios could have been presented in Alternative 1 or Alternative 2. The results are substantially similar so that we have adopted a 'conservative' approach (Mitchell & Carson 1989) and have included in Table 5 only the lowest values; they refer to ASC2.

The variations of individual surplus are then calculated using Equation (5). This involves the marginal utility of the monetary attribute. It provides the WTP of an average household for the resilience programs, according to the levels of the attributes being considered. As previously, this is calculated for the different levels of COST. Results show that welfare gains are higher with R++ than with R+. This was to be expected, since R++ contains more stringent measures aimed at improving the resilience of the WDN. Whatever the level of COST, respondents agree to pay to benefit from further technical solutions. These WTP range from €4.80 to

€44.80 per household depending on the level of the monetary attribute. They are also willing to pay for optimised technical solutions, a more secure supervision system, better training for staff and user awareness programs. These WTP range from €18.94 to €58.94 per household depending on the level of the monetary attribute.

### Aggregation of the benefits

The monetary attribute was expressed as a single payment per household. The aggregate benefits  $CS_a$  are thus computed by multiplying, for each resilience program, the individual surplus variation by the number of households living in the Eurométropole de Strasbourg, that is to say:

$$CS_a = n \times CS_i \quad (8)$$

with (data of the French national institute for statistics and economic studies for 2015):

$$n = 222,955$$

Table 5 provides the results.

## DISCUSSION

### Implications for policies

The aggregated benefits provided by the resilience programs in the Eurométropole de Strasbourg are positive and (logically) decrease with the level of the monetary attribute, i.e. what households would have to pay for the implementation of resilience programs. They range from €1.07 to €12.7 million depending on the program and its cost (let us recall that this is a lump-sum payment). As expected, the benefits provided by the intermediate program R+ are lower than those provided by the more advanced program R++.

As a comparison, the annual water bill for a consumption of 120 m<sup>3</sup>, which corresponds to the average annual consumption in France (Barbier & Montginoul 2013), was €343 in 2018 in the territory of the Eurométropole de Strasbourg. Of this amount, around €193 relates to drinking

**Table 5** | Indirect utilities, individual surplus variations and aggregated benefits for R+ and R++

|                                  | COST levels | R +       | R ++       |
|----------------------------------|-------------|-----------|------------|
| Indirect utility                 | COST = 10   | − 0.11    | 0.22       |
| $V_R$                            | COST = 20   | − 0.39    | − 0.05     |
|                                  | COST = 30   | − 0.66    | − 0.33     |
|                                  | COST = 40   | − 0.93    | − 0.60     |
|                                  | COST = 50   | − 1.21    | − 0.87     |
| Variations in individual surplus | COST = 10   | 44.80     | 58.94      |
| $CS_i$                           | COST = 20   | 34.80     | 48.94      |
|                                  | COST = 30   | 24.80     | 38.94      |
|                                  | COST = 40   | 14.80     | 28.94      |
|                                  | COST = 50   | 4.80      | 18.94      |
| Aggregated benefits              | COST = 10   | 9,988,808 | 12,696,144 |
| CS                               | COST = 20   | 7,759,258 | 10,466,594 |
|                                  | COST = 30   | 5,529,708 | 8,237,044  |
|                                  | COST = 40   | 3,300,158 | 6,007,494  |
|                                  | COST = 50   | 1,070,608 | 3,777,944  |

water (subscription, consumption and taxes and charges). These values are well above the estimated WTP, which range from €4.80 to €44.80 per household for R+ and from €18.94 to €58.94 per household for R++, depending on the level of the monetary attribute. Paying to implement the resilience measures may therefore be regarded as acceptable to users, especially if payments are spread out in time. R+ at least may be envisaged. It is reasonable to assume that damage, disruption, and reconstruction costs in the case of a crisis without extra protective measures would be very high, and could greatly outweigh the investment costs in resilience programs (Hall *et al.* 2019a). R++ might also be set up assuming that, for instance, it allows greater efficiency in the operation of the service.

### Strengths and limitations of data collection and methodology

Choice Experiment, which is used in this study, is a powerful methodology for estimating the monetary value of non-market goods and services. It provides credible estimates and rich insights for decision-making. The methodology used does, however, have some limitations that need to be acknowledged, the most important relating to data collection. Indeed, as the Eurométropole de Strasbourg covers a vast area, the survey had to be administered in strategically chosen locations, such as shopping centres, railway stations, etc. A potential bias in the selection of respondents may in consequence have occurred. For instance, those who took the train more often were more likely to participate in the study. To prevent this risk, we relied on trained, skilled, and qualified personnel. One in ten people who passed by the surveyors was asked to participate in the investigation. Surveyors were at the various sites at different times of the day, and on different days of the week. Interviewing was also guided by quotas based on cities to respect specific local conditions.

Another limitation of many CE studies has to do with questionnaire design. In our case, there were no problems with understanding or acceptance of scenarios. The questionnaire had been previously tested and then modified to rephrase biased, leading questions, or eliminate pointless ones. We had no negative feedback regarding the final version. Also, follow-up questions used to explore the

motivations behind the answers given and examining the credibility of the valuation scenario (Bennett & Blamey 2001) show that the questionnaire and scenarios were properly designed and well understood. Specifically, they show that:

- (i) a majority of respondents think that the probability of a cyberattack occurring in their municipality within the next five years is low, a result that could call into question the credibility of our scenarios (Johnston *et al.* 2017), but very few rank it as very low and, more importantly, this was somehow expected since cyberattacks are a relatively new form of risk;
- (ii) only a very limited number of respondents did not attach particular importance to an attribute, which is what is expected of them (Campbell *et al.* 2008);
- (iii) the same holds true for protest behaviours, i.e. respondents who protest against some aspect of the scenarios (Meyerhoff & Liebe 2008);
- (iv) the majority of respondents are confident in the effectiveness of the proposed resilience measures in countering the impacts of a cyberattack and in the ability of the utility to implement them.

### CONCLUSION

This article presents an assessment of the aggregated benefits of two programs aimed at improving the resilience of a WDN subject to a cyberattack. The survey was conducted on inhabitants of the Eurométropole de Strasbourg in France.

Our results suggest that the benefits are high, which shows the appeal of this assessment since, as they lack market value, one would have reasonably assumed they had no value at all (Champ *et al.* 2017). They also highlight the fact that residents understand, perceive and attach value to issues related to human-induced risks. This finding responds to an essential issue, since the likelihood of cyberattacks may well increase in the future (Clark *et al.* 2017). It is therefore important in that it informs decision makers, and is crucial to their making the right decisions at the right times. Basing our study on the cyberattack scenario also enabled us to undertake a first assessment of

inhabitants' WTP for improving the resilience of WDNs in the face of a human-induced risk, without water being intentionally contaminated. The latter may indeed have led to biased responses due to its highly anxiogenic nature.

This outcome is a first step. Coupled with an assessment of the costs these resilience measures would incur for the utility, these aggregate benefits provide information for making an 'optimal' decision from a cost-benefit point of view. Indeed, offsetting the cost of implementation against their benefits provides for a basis to consider the economic efficiency of these actions, i.e. the best balance between the means and the results. Questions may arise, for example, as to whether the implementation of resilience programs would lead to increased efficiency and enhance service improvements. This calls for further development to provide stakeholders with a clearer picture. It also highlights the need to address what people are willing to pay to mitigate other types of risks (e.g. intentional contamination of water), for the protection of other critical infrastructures which may fall victim to cyberattacks, such as nuclear power plants, as well as the mitigation of the so-called 'domino effect', whereby disruption to one infrastructure can spread to a myriad of other infrastructures.

## ACKNOWLEDGEMENTS

This work is part of the Franco-German ResiWater project ('Innovative Secure Sensor Networks and Model-based Assessment Tools for Increased Resilience of Water Infrastructures') funded by ANR and BMBF under the call 'Protection of Critical Infrastructures PICS 2014'. The author would like to thank Caty Wery of INRAE as well as Nathalie Pasquet, Jean-Marc Weber and Marc Baruthio of Eurométropole de Strasbourg for their advice and comments with questionnaire design and data collection.

## REFERENCES

- Adegun, O. 2017 [Developing green infrastructure in a Johannesburg informal settlement: investigating residents' willingness to pay](#). *Procedia Engineering* **198**, 176–186.
- Appiah, A., Adamowicz, W. L., Lloyd-Smith, P. & Dupont, D. 2019 [Reliability of drinking water: risk perceptions and economic value](#). *Water Economics and Policy* **5** (2), 1850020.
- Baik, S., Davis, A. L., Park, J. W., Sirinterlikci, S. & Morgan, M. G. 2020 [Estimating what US residential customers are willing to pay for resilience to large electricity outages of long duration](#). *Nature Energy* **5**, 250–258.
- Barbier, R. 2011 [Chapitre 6. La sécurisation de l'approvisionnement en eau potable: un tour d'horizon des enjeux et des leviers d'action](#) [Chapter 6. Ensuring the supply of drinking water: an overview of the issues and levers for action]. In: *Des tuyaux et des hommes – Les réseaux d'eau en France* (G. Bouleau & L. Guérin-Schneider, eds), Editions Quae, Versailles, France, pp. 121–133.
- Barbier, R. & Montginoul, M. 2013 [120 m<sup>3</sup> – Le consommateur d'eau en question: avant-propos](#) [120 m<sup>3</sup> – The water consumer in question: foreword]. *Sciences Eaux et Territoires* **10**, 2–3.
- Bech, M. & Gyrd-Hansen, D. 2005 [Effects coding in discrete choice experiments](#). *Health Economics* **14** (10), 1079–1083.
- Benabid, M., Heim, V., Hamon, J.-L. & Mestre, A. 2012 [Évaluation de la vulnérabilité des installations d'eau potable – Le cas pratique du Sedif](#) [Assessment of the vulnerability of water supply networks – the real case of Sedif]. *Techniques – Sciences – Méthodes* **1/2**, 23–28.
- Bennett, J. (ed.) 2011 *The International Handbook on Non-Market Environmental Valuation*. Edward Elgar, Cheltenham, UK.
- Bennett, J. & Adamowicz, V. 2001 Some fundamentals of environmental choice modelling. In: *The Choice Modelling Approach to Environmental Valuation* (J. Bennett & R. Blamey, eds), Edward Elgar, Cheltenham, UK, pp. 37–69.
- Bennett, J. & Blamey, R. (eds) 2001 *The Choice Modelling Approach to Environmental Valuation*. Edward Elgar, Cheltenham, UK.
- Boin, A. & McConnell, A. 2007 [Preparing for critical infrastructure breakdowns: the limits of crisis management and the need for resilience](#). *Journal of Contingencies and Crisis Management* **15**, 50–59.
- Brozović, N., Sunding, D. L. & Zilberman, D. 2007 [Estimating business and residential water supply interruption losses from catastrophic events](#). *Water Resources Research* **43** (8), W08423.
- Bruneau, M., Chang, S. E., Eguchi, R. T., Lee, G. C., O'Rourke, T. D., Reinhorn, A. M., Shinozuka, M., Tierney, K., Wallace, W. A. & von Winterfeldt, D. 2003 [A framework to quantitatively assess and enhance the seismic resilience of communities](#). *Earthquake Spectra* **19** (4), 733–752.
- Campbell, D., Hutchinson, W. G. & Scarpa, R. 2008 [Incorporating discontinuous preferences into the analysis of discrete choice experiments](#). *Environmental and Resource Economics* **41** (3), 401–417.
- Champ, P. A., Boyle, K. J. & Brown, T. C. (eds) 2017 *A Primer on Nonmarket Valuation*, 2nd edn. Springer, Amsterdam, The Netherlands.
- Clark, R. M., Panguluri, S., Nelson, T. D. & Wyman, R. P. 2017 [Protecting drinking water utilities from cyberthreats](#). *Journal of the American Water Works Association* **109** (2), 50–58.
- Cooper, B., Burton, M. & Crase, L. 2019 [Willingness to pay to avoid water restrictions in Australia under a changing](#)



- climate. *Environmental and Resource Economics* **72**, 823–847.
- Croissant, Y. 2020 *Package ‘mlogit’ Version 1.0-3.1*. Available from: <https://CRAN.R-project.org/package=mlogit> (accessed 6 April 2020).
- Cummings, R. G. & Taylor, L. O. 1999 *Unbiased value estimates for environmental goods: a cheap talk design for the contingent valuation method*. *American Economic Review* **89** (3), 649–665.
- Dachary-Bernard, J. 2007 La méthode des choix multi-attributs appliquée aux Monts d'Arrée [Application of choice experiments to the Monts d'Arrée]. *Cahiers d'Économie et Sociologie Rurales* **84–85**, 133–166.
- de Bruijn, K., Buurman, J., Mens, M., Dahm, R. & Klijn, F. 2017 *Resilience in practice: five principles to enable societies to cope with extreme weather events*. *Environmental Science & Policy* **70**, 21–30.
- del Saz-Salazar, S., García-Rubio, M. A., González-Gómez, F. & Picazo-Tadeo, A. J. 2016 *Managing water resources under conditions of scarcity: on consumers' willingness to pay for improving water supply infrastructure*. *Water Resources Management* **30**, 1723–1738.
- Environment Agency 2015 *Water Supply and Resilience and Infrastructure: Environment Agency Advice to Defra*. Environment Agency, Bristol, UK.
- Eurométropole de Strasbourg 2017 *Rapport Annuel 2016 sur la qualité et le prix des services publics de l'eau et de l'assainissement [2016 Annual Report on the Quality and Price of Water and Sanitation Services]*. Eurométropole de Strasbourg, Strasbourg, France.
- Galland, J.-P. 2010 *Critique de la notion d'infrastructure critique [Critical analysis of the concept of critical infrastructures]*. *Flux* **81**, 6–18.
- Greene, W. H. 2003 *Econometric Analysis*. Prentice Hall, Pearson Education International, Upper Saddle River, NJ, USA.
- Griffin, R. C. & Mjelde, J. W. 2000 *Valuing water supply reliability*. *American Journal of Agricultural Economics* **82** (2), 414–426.
- Haimes, Y. Y., Matalas, N. C., Lambert, J. H., Jackson, B. A. & Fellows, J. F. R. 1998 *Reducing vulnerability of water supply systems to attack*. *Journal of Infrastructure Systems* **4** (4), 164–177.
- Hall, J. W., Aerts, J. C. J. H., Ayyub, B. M., Hallegatte, S., Harvey, M., Hu, X., Koks, E., Lee, C., Liao, X., Mullan, M., Pant, R., Paszkowski, A., Rozenberg, J., Sheng, F., Stenek, V., Thacker, S., Väänänen, E., Vallejo, L., Veldkamp, T. I. E., van Vliet, M., Wada, Y., Ward, P., Watkins, G. & Zorn, C. 2019a *Adaptation of Infrastructure Systems: Background Paper for the Global Commission on Adaptation*. Environmental Change Institute, University of Oxford, Oxford, UK.
- Hall, J. W., Borgomeo, E., Bruce, A., Di Mauro, M. & Mortazavi-Naeini, M. 2019b *Resilience of water resource systems: lessons from England*. *Water Security* **8**, 100052.
- Hanemann, M. 1984 *Welfare evaluations in contingent valuation experiments with discrete responses*. *American Journal of Agricultural Economics* **66** (3), 332–341.
- Hanemann, M. & Kanninen, B. 1999 *The statistical analysis of discrete-response CV data*. In: *Valuing Environmental Preferences: Theory and Practice of the Contingent Valuation Method in the US, EC, and Developing Countries* (I. J. Bateman & K. G. Willis, eds), Oxford University Press, Oxford, UK, pp. 302–441.
- Hensher, D. A. & Johnson, L. W. 1981 *Applied Discrete-Choice Modelling*. Wiley, Hoboken, NJ, USA.
- Hensher, D. A., Rose, J. M. & Greene, W. H. 2005a *Applied Choice Analysis: A Primer*. Cambridge University Press, Cambridge, UK.
- Hensher, D., Shore, N. & Train, K. 2005b *Households' willingness to pay for water service attributes*. *Environmental and Resource Economics* **32**, 509–531.
- Hensher, D., Shore, N. & Train, K. 2006 *Water supply security and willingness to pay to avoid drought restrictions*. *Economic Record* **82** (256), 56–66.
- Hess, S. & Daly, A. (eds) 2014 *Handbook of Choice Modelling*. Edward Elgar, Cheltenham, UK.
- Holmes, T. P. & Adamowicz, W. L. 2003 *Attribute-based methods*. In: *A Primer on Nonmarket Valuation* (P. A. Champ, K. J. Boyle & T. Brown, eds), Kluwer Academic Publishers, Dordrecht, The Netherlands, pp. 171–219.
- Howe, C. W. & Smith, M. G. 1993 *Incorporating public preferences in planning urban water supply reliability*. *Water Resources Research* **29** (10), 3363–3369.
- Howe, C. W., Smith, M. G., Bennett, L., Brendecke, C. M., Flack, J. E., Hamm, R. M., Mann, R., Rozaklis, L. & Wunderlich, K. 1994 *The value of water supply reliability in urban water systems*. *Journal of Environmental Economics and Management* **26** (1), 19–30.
- Islam, M. S., Afrin, S., Ahsan, M. N., Haider, M. Z., Mamun, T. M. & Das, D. K. 2019 *Households' willingness to pay for disaster resilient safe drinking water sources in southwestern coastal Bangladesh*. *International Journal of Disaster Risk Science* **10**, 544–556.
- Janke, R., Tryby, M. E. & Clark, R. M. 2014 *Protecting water supply critical infrastructure: an overview*. In: *Securing Water and Wastewater Systems: Global Experiences* (R. M. Clark & S. Hakim, eds), Springer International Publishing, Cham, Switzerland, pp. 29–85.
- Johannessen, Å. & Wamsler, C. 2017 *What does resilience mean for urban water services?* *Ecology and Society* **22** (1), 1.
- Johnston, R. J., Boyle, K. J., Adamowicz, W., Bennett, J., Brouwer, R., Cameron, T. A., Hanemann, W. M., Hanley, N., Ryan, M., Scarpa, R., Tourangeau, R. & Vossler, C. A. 2017 *Contemporary guidance for stated preference studies*. *Journal of the Association of Environmental and Resource Economists* **4** (2), 319–405.
- Kahneman, D., Knetsch, J. L. & Thaler, R. H. 1991 *Anomalies: the endowment effect, loss aversion, and status quo bias*. *Journal of Economic Perspectives* **5** (1), 193–206.
- Koss, P. & Khawaja, M. S. 2001 *The value of water supply reliability in California: a contingent valuation study*. *Water Policy* **3** (2), 165–174.



- Lancaster, K. J. 1966 [A new approach to consumer theory](#). *Journal of Political Economy* **74** (2), 132–157.
- Louviere, J. 1988 *Analyzing Individual Decision Making: Metric Conjoint Analysis*. Sage Publications, Newbury Park, CA, USA.
- Maliszewski, P., Larson, E. & Perrings, C. 2013 [Valuing the reliability of the electrical power infrastructure – a two-stage hedonic approach](#). *Urban Studies* **50** (1), 72–87.
- Manski, C. F. 1977 [The structure of random utility models](#). *Theory and Decision* **8**, 229–254.
- McFadden, D. 1974 Conditional logit analysis of qualitative choice behaviour. In: *Frontiers in Econometrics* (P. Zarembka, ed.), Academic Press, New York, USA, pp. 105–142.
- Meyerhoff, J. & Liebe, U. 2008 [Do protest responses to a contingent valuation question and a choice experiment differ?](#) *Environmental and Resource Economics* **39**, 433–446.
- Meyerhoff, J. & Liebe, U. 2009 [Status quo effect in choice experiments: empirical evidence on attitudes and choice task complexity](#). *Land Economics* **85** (3), 515–528.
- Mitchell, R. C. & Carson, R. T. 1989 *Using Surveys to Value Public Goods: The Contingent Valuation Method*. Resources for the Future Press, Baltimore, MD, USA.
- Price, J. I., Lloyd-Smith, P. R., Dupont, D. P. & Adamowicz, W. L. 2019 [Floods and water service disruptions: eliciting willingness-to-pay for public utility pricing and infrastructure decisions](#). *Water Economics and Policy* **5** (2), 1850021.
- Rose, J., Bliemer, M. C. J., Hensher, D. A. & Collins, A. T. 2007 [Designing efficient stated choice experiments in the presence of reference alternatives](#). *Transportation Research Part B: Methodological* **42** (4), 395–406.
- Tapsuwan, S., Burton, M., Mankad, A., Tucker, D. & Greenhill, M. 2014 [Adapting to less water: household willingness to pay for decentralised water systems in urban Australia](#). *Water Resources Management* **28**, 1111–1125.
- Thacker, S., Kelly, S., Pant, R. & Hall, J. W. 2018 [Evaluating the benefits of adaptation of critical infrastructures to hydrometeorological risks](#). *Risk Analysis* **38** (1), 134–150.
- Wang, Y., Sun, M. & Song, B. 2017 [Public perceptions of and willingness to pay for sponge city initiatives in China](#). *Resources, Conservation and Recycling* **122**, 11–20.
- Wang, C., Sun, J., Russell, R. & Daziano, R. A. 2018 [Analyzing willingness to improve the resilience of New York City's transportation system](#). *Transport Policy* **69**, 10–19.
- Werey, C., Rulleau, B., Carlados, S., Grangeat, A., Joalland, O., Labépie, E., Piller, O. & Tacnet, J.-M. 2016 [Risque, vulnérabilité, résilience : quels apports pour la gestion patrimoniale des ouvrages de protection et des réseaux urbains \[Risk, vulnerability, resilience: what inputs for protection works and urban networks asset management?\]](#). *Sciences Eaux & Territoires* **20**, 10–15.
- Zalejska-Jonsson, A., Wilkinson, S. J. & Wahlund, R. 2020 [Willingness to pay for green infrastructure in residential development – a consumer perspective](#). *Atmosphere* **11**, 152.

First received 4 July 2019; accepted in revised form 4 June 2020. Available online 17 June 2020
